# Supplementary material
Source: PubMed Central journal article supplement (PMC6687515)
Supplement: NIHMS1043634-supplement-1.pdf [file NIHMS1043634-supplement-1.pdf]

## Supporting Information

### **Real-Time Imaging of Vaccine Biodistribution Using Zwitterionic NIR Nanoparticles**

*Wataru Katagiri, Jeong Heong Lee, Marc-André Tétrault, Homan Kang, Sinyoung Jeong, Conor L. Evans, Shinya Yokomizo, Sheena Santos, Catherine Jones, Shuang Hu, Georges El Fakhri, Kosuke Tsukada, Hak Soo Choi<sup>\*</sup>, and Satoshi Kashiwagi<sup>\*</sup>*

**Supporting Figures:**

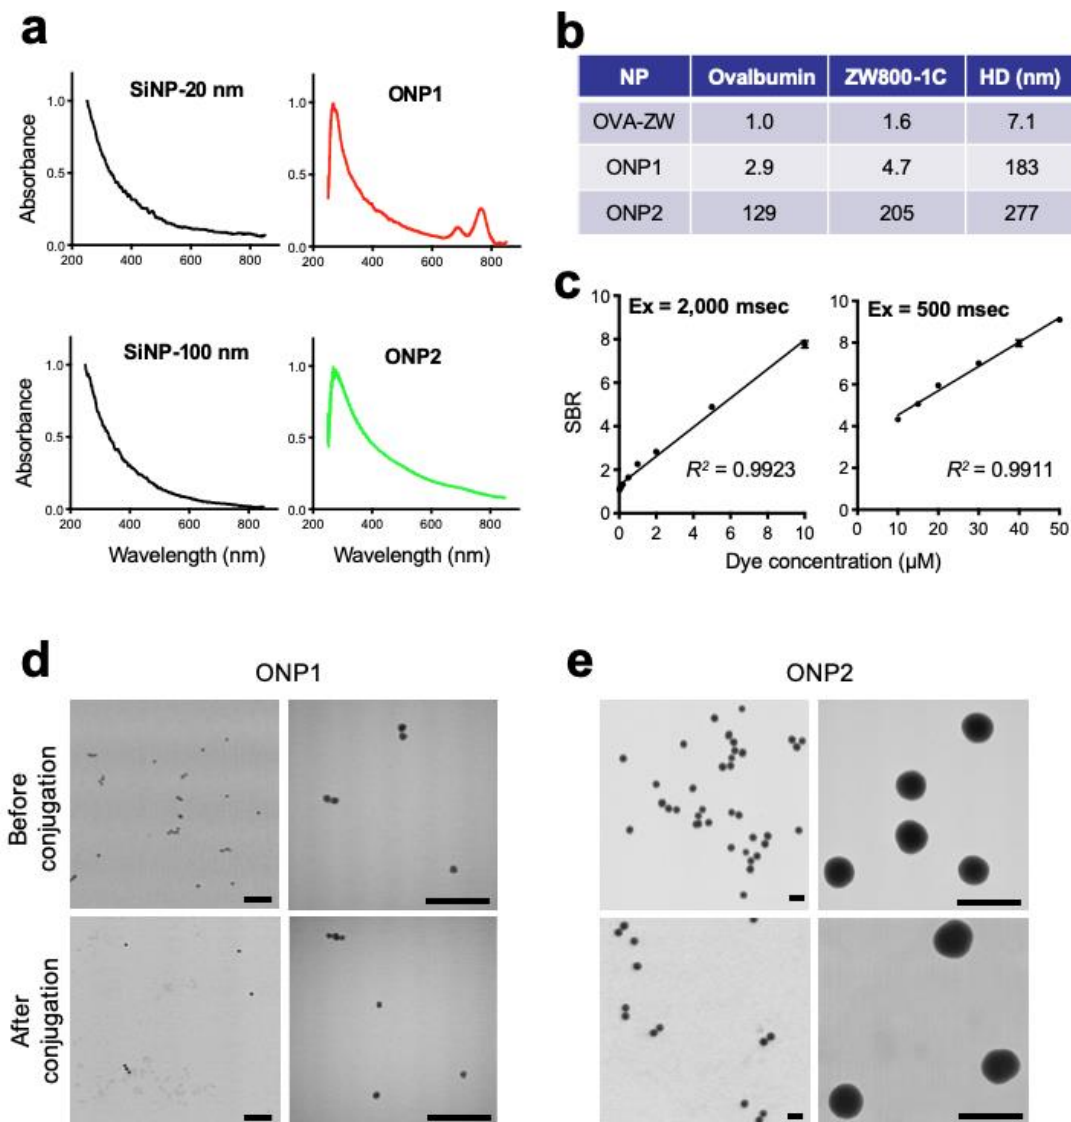

**Figure S1.** Determination of dye labeling ratio on model vaccines. a) The conjugation ratio of each ONPs was determined based on the Beer-Lambert's law by measuring absorbance spectra of each model vaccine before and after conjugation using a UV-Vis-NIR spectrophotometer. b) Summary of conjugation ratio and HD of OVA-ZW, ONP1 and ONP2. c) Relationship between the concentration of ZW800-1C and its fluorescence signal on the FLARE system among different exposure times (left: 2,000 msec vs. right: 500 msec). Note that there is a linear relationship between the signal and dye concentration ( $n = 3$ , mean  $\pm$  SEM.). d-e) TEM images

of d) ONP1 and e) ONP2 dispersed in pure water at different magnifications. Scale bars = 200 nm.

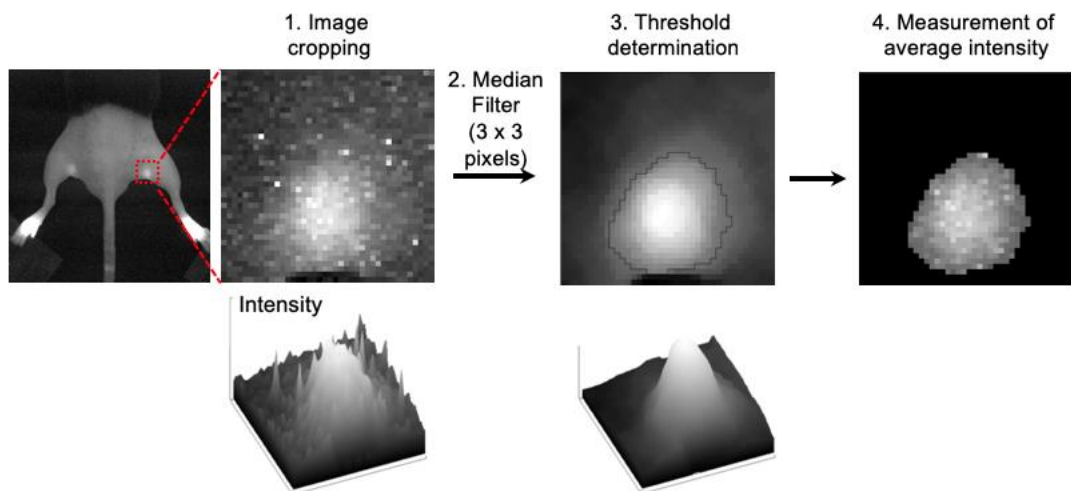

**Figure S2.** Quantitative ROI determination and intensity measurement scheme. All NIR fluorescence images were normalized identically for all conditions of an experiment to determine the ROI quantitatively. First, approximately 50×50 pixels of an image were cropped around the signal region of LN. Second, a 3×3 median filter was applied to the average noise. Third, a LN signal threshold was identified by an iterative selection method to determine the ROI. Finally, the average intensity of the ROI was measured on the original image.

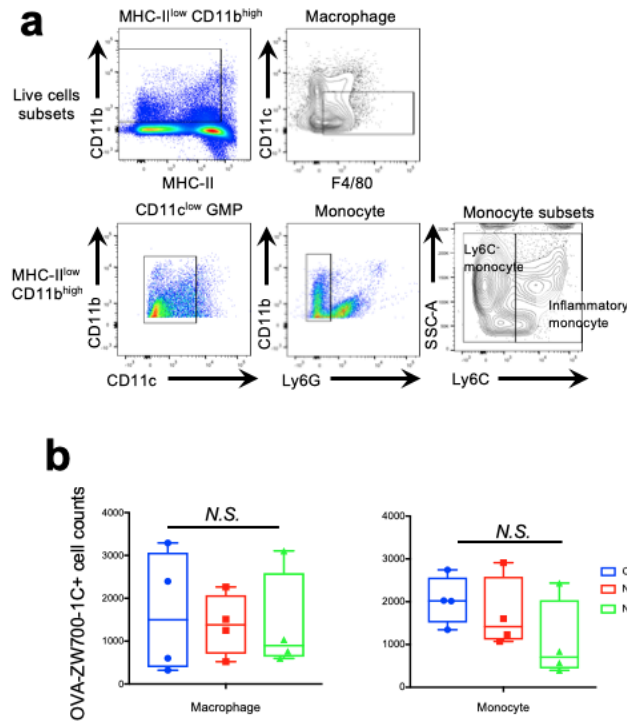

**Figure S3.** Flow cytometry analysis of vaccine uptake by macrophages and monocytes. Uptake of the conjugated vaccine in macrophage and monocyte populations in the draining LNs was assessed by flow cytometry 72 h post-intradermal injection. a) Gating schematic to identify macrophage and monocyte populations within LNs. b) Cell counts of OVA-ZW positive macrophage and monocyte populations within LNs ( $n = 4$ , median  $\pm$  95% confidence interval). A  $P$  value of less than 0.05 was considered significant: *N.S.*, not significant by one-way ANOVA.

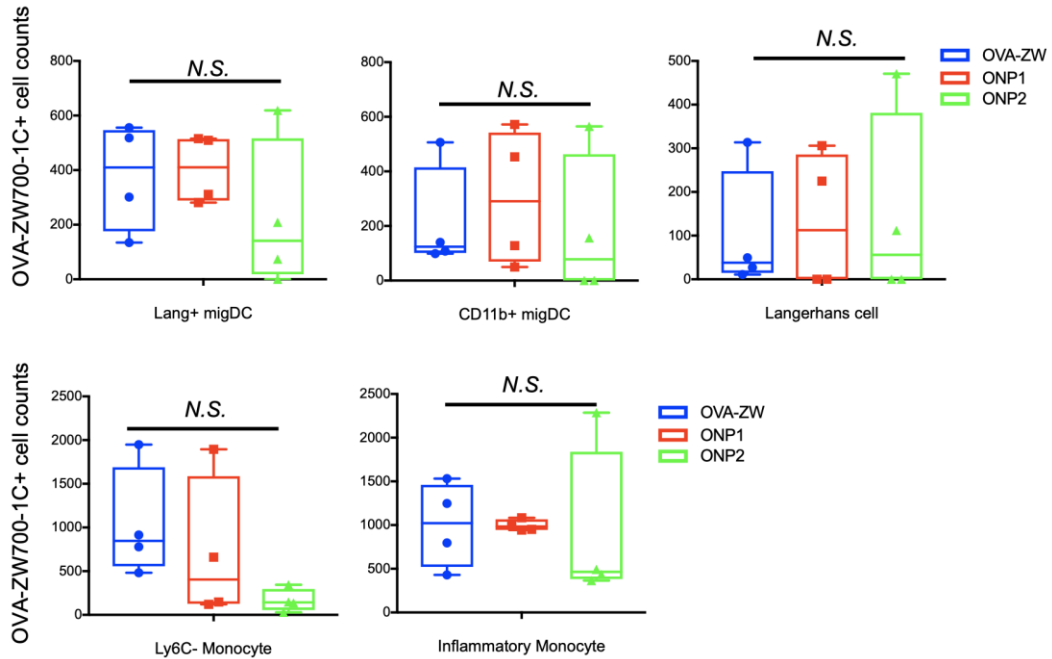

**Figure S4.** Flow cytometry analysis of vaccine uptake by APCs. Uptake of the model vaccines in DC and monocyte populations in the draining LNs was assessed by flow cytometry 72 h post-intradermal injection. Cell counts of OVA-ZW positive migDC and monocyte subsets ( $n = 4$ , median  $\pm$  95% confidence interval). A  $P$  value of less than 0.05 was considered significant: *N.S.*, not significant by one-way ANOVA.

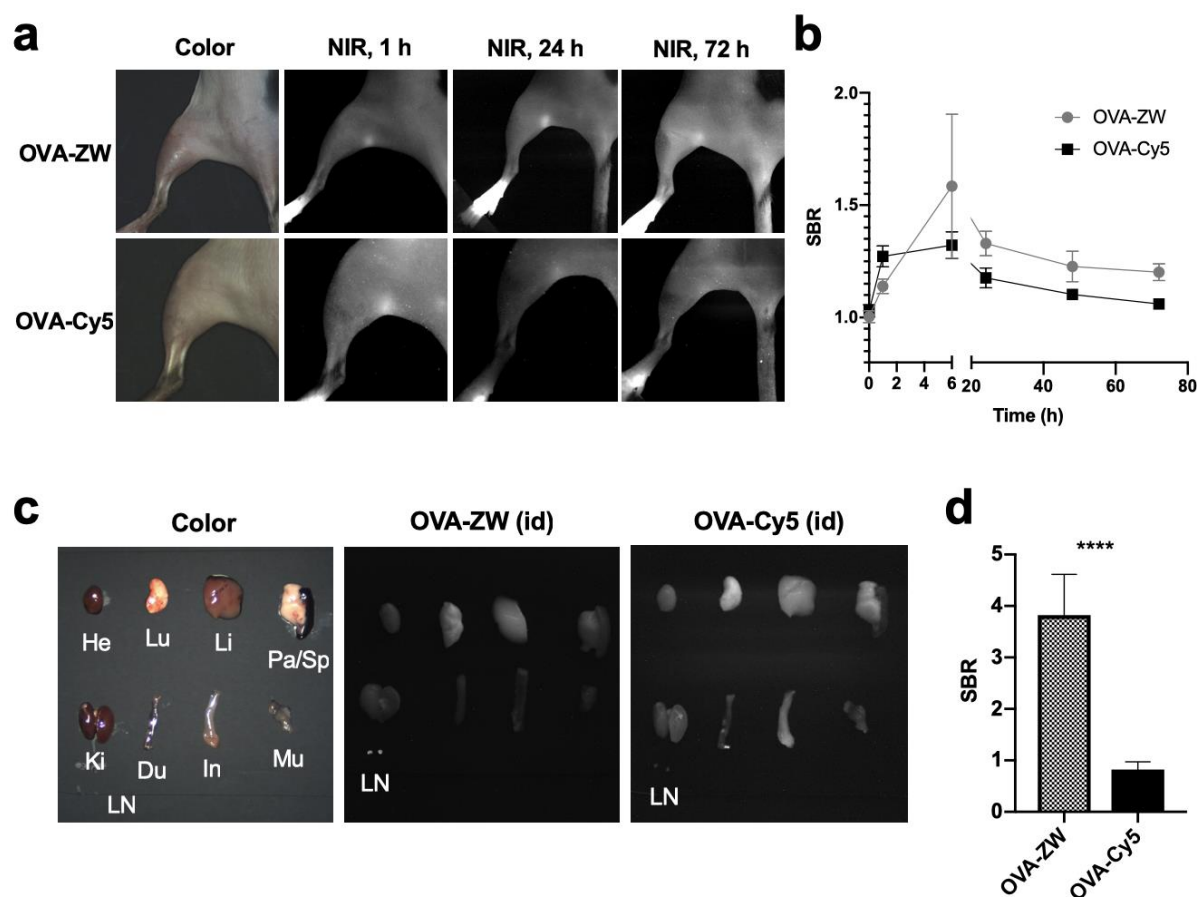

**Figure S5.** Comparison of fluorescence signals from a model vaccine conjugated to ZW800-1C or Cy5 after intradermal injection. a) Representative images of mice 1, 24 and 72 h post-injection with the conjugated model vaccines. Both 660 nm and 760 nm lasers' irradiance were adjusted to be  $1.5 \text{ mW/cm}^2$  on the FLARE system. b) The SBR of popliteal LNs was calculated by comparing with background skin signals ( $n = 3-4$ , mean  $\pm$  SEM.). c) Major organs including heart (He), lungs (Lu), liver (Li), pancreas (Pa), spleen (Sp), kidneys (Ki), duodenum (Du), intestine (In), muscle (Mu), and lymph node (LN) were resected and imaged 72 h post-intradermal injection of the conjugated model vaccine. d) The SBR of LNs are compared with the fluorescence signals of muscle ( $n = 4-6$ , mean  $\pm$  SEM.). d) A  $P$  value of less than 0.05 was considered significant: \*\*\*\* $P < 0.0001$  by Student's t-test.
